# Supplementary material for: Ubiad1 Is an Antioxidant Enzyme that Regulates eNOS Activity by CoQ10 Synthesis
Source: PubMed Central journal article supplement — Cell. 2013 Jan 31;152(3):504–18. doi: 10.1016/j.cell.2013.01.013 (PMC3574195; doi:10.1016/j.cell.2013.01.013), 2013-01-31
Supplement: mmc1.pdf [file mmc1.pdf]

**Table S1. Vascular-Specific Expression of Ubiad1 Efficiently Rescues *ubiad1* Morphants, Related to Figure 1 and Figure S1**

| Experiments | Total Injected Embryos | N. of <i>ubiad1</i> Morphants Showing WT Phenotype | N. of <i>ubiad1</i> Morphants Showing <i>bar-Like</i> Phenotype | Penetrance of <i>ubiad1</i> Morpholino (%) | Tg Background |
|-------------|------------------------|----------------------------------------------------|-----------------------------------------------------------------|--------------------------------------------|---------------|
| Exp1        | 39                     | 13                                                 | 26                                                              | 66.67                                      | s843          |
| Exp2        | 174                    | 60                                                 | 114                                                             | 65.52                                      | s843          |
| Exp1        | 17                     | 13                                                 | 4                                                               | 23.53                                      | s843:uto35    |
| Exp2        | 45                     | 33                                                 | 12                                                              | 26.67                                      | s843: uto35   |

The table summarizes numbers and penetrance of embryos showing wild-type (wt) or *ubiad1* morpholino phenotype (*bar-like*) after injection of *ubiad1* morpholino in *Tg(kdrl:GFP)<sup>s843</sup>* or *Tg [(Kdrl-Ubiad1-2A-mCherry)<sup>uto35</sup>:(kdrl:GFP)<sup>s843</sup>]* lines. The penetrance of *ubiad1* morpholino is significantly lower in *Tg [(Kdrl-Ubiad1-2A-mCherry)<sup>uto35</sup>]* background where exogenous Ubiad1 is expressed under a vascular-specific promoter. These results indicate that Ubiad1 is endothelial cell autonomous. Results are shown as a mean of n=2 independent experiments.
